# Supplementary material for: Functional Complementation of Anti-Adipogenic Phytonutrients for Obesity Prevention and Management
Source: MDPI journal article supplement (doi:10.3390/nu14204325), 2022-10-16
Supplement: s1 [file s1]

**Supplementary Materials**

**Functional Complementation of Anti-Adipogenic  
Phytonutrients for Obesity Prevention and Management**

**Yasuyo Urasaki and Thuc T. Le \***

College of Pharmacy, Roseman University of Health Sciences, 10530 Discovery Drive, Las Vegas, NV 89135, USA

\*Correspondence: Thuc T. Le, [tle5@roseman.edu](mailto:tle5@roseman.edu)

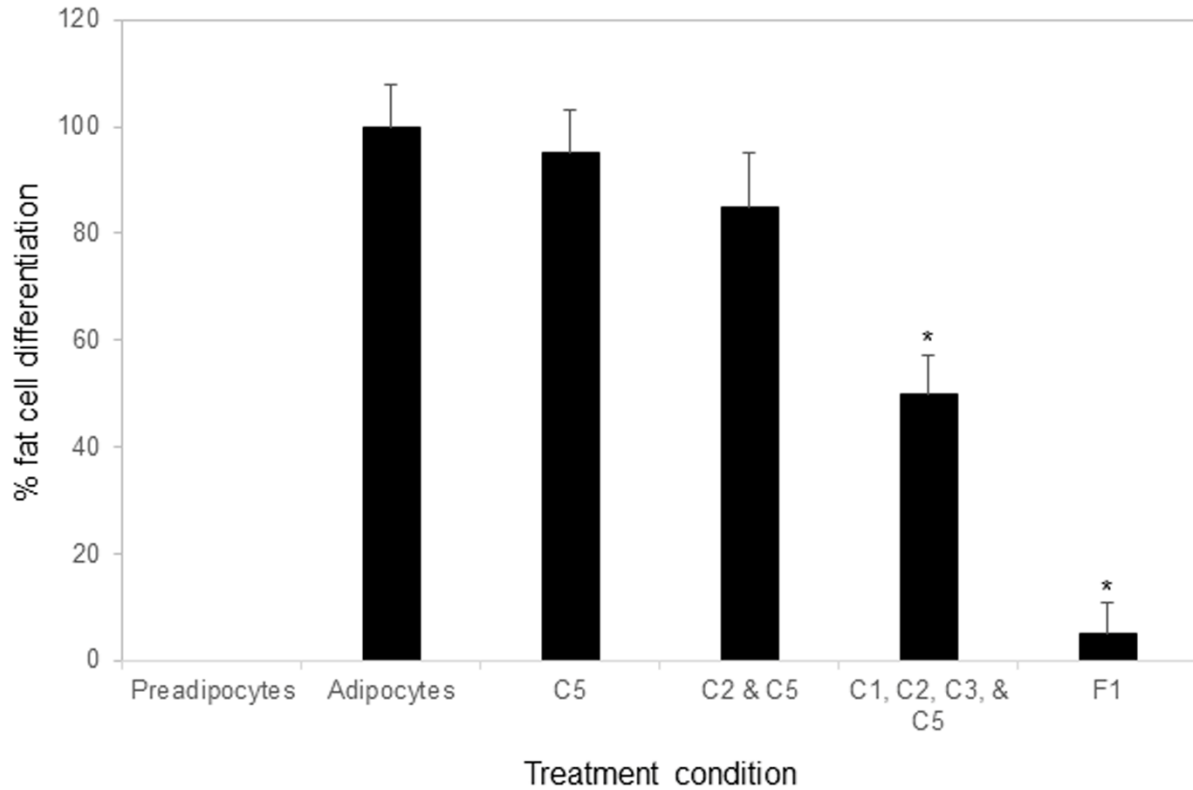

**Figure S1.** Anti-adipogenic effects of individual and combinations of phytonutrients on d14. H&E- and ORO-stained images were visually examined and manually counted for the number of differentiated cells as a function of total cells, which included differentiated and undifferentiated cells, in each 600 x 450  $\mu\text{m}$  field of view. Hematoxylin-stained nuclei provided the number of total cells and ORO-stained cells provided the number of differentiated cells. At least ten field-of-views were used to calculate the percentage of fat cell differentiation for each experimental condition. Preadipocytes: undifferentiated preadipocytes in growth media; adipocytes: differentiating preadipocytes; differentiating preadipocytes. in complete differentiation media supplemented with C5 (quercetin), C2 & C5 (luteolin & quercetin), C1, C2, C3, & C5 (berberine, luteolin, resveratrol, & quercetin), or F1 composition. The error bars indicate the standard deviations across ten field-of-views examined per experimental condition. Asterisk (\*) indicates a statistical significance of  $p$ -value  $\leq 0.01$  versus adipocytes treatment condition.

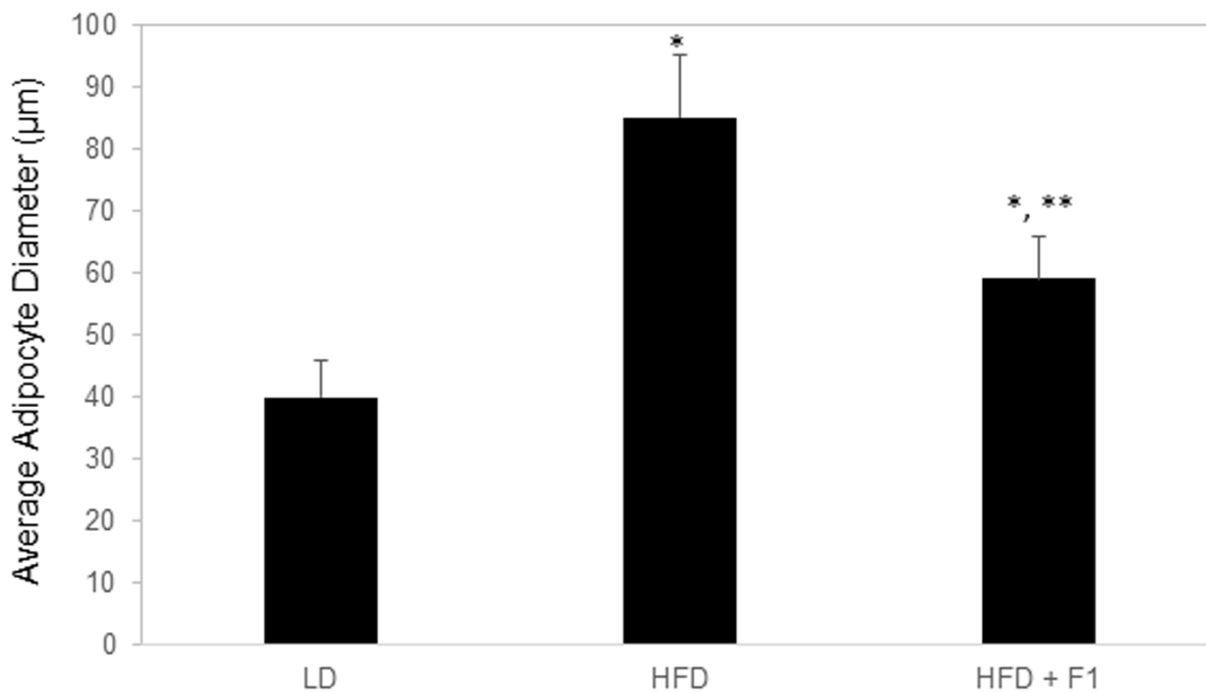

**Figure S2.** Average adipocyte diameter as a function of diet groups. H&E histology images of visceral adipose tissues were used for manual measurement of adipocyte diameters. The diameters of approximately 50 adipocytes were measured for each collected visceral adipose tissue, or 2000 adipocytes total for forty mice per diet group, using ImageJ software (National Institutes of Health, Bethesda, Maryland, USA). The error bars indicate the standard deviations across 2000 adipocytes measured for forty mice in each diet group. Single asterisk (\*) indicates a statistical significance of  $p$ -value  $\leq 0.01$  versus the lean diet group. Double asterisks (\*\*) indicates a statistical significance of  $p$ -value  $\leq 0.01$  versus the high-fat diet group.

**Table S1.** Phytonutrients for cell cultures

| Phytonutrient | Cat. No. | Purity | Supplier                        |
|---------------|----------|--------|---------------------------------|
| Berberine     | 10006427 | ≥95%   | Cayman Chem, Ann Arbor, MI, USA |
| Luteolin      | 10004164 | ≥98%   | Cayman Chem, Ann Arbor, MI, USA |
| Resveratrol   | 70675    | ≥98%   | Cayman Chem, Ann Arbor, MI, USA |
| Fisetin       | 15246    | ≥90%   | Cayman Chem, Ann Arbor, MI, USA |
| Quercetin     | 10005169 | ≥95%   | Cayman Chem, Ann Arbor, MI, USA |
| Fucoidan      | 20357    | ≥85%   | Cayman Chem, Ann Arbor, MI, USA |
| EGCG          | 70935    | ≥96%   | Cayman Chem, Ann Arbor, MI, USA |
| Hesperidin    | 18646    | ≥98%   | Cayman Chem, Ann Arbor, MI, USA |
| Curcumin      | 81025    | ≥90%   | Cayman Chem, Ann Arbor, MI, USA |

**Table S2.** Phytonutrients for dietary supplement

| Phytonutrient | Cat. No.    | Purity | Supplier                                  |
|---------------|-------------|--------|-------------------------------------------|
| Berberine     | BPBE-698    | ≥97%   | Benepure, Chengdu, Sichuan, China         |
| Luteolin      | BPBE-626    | ≥98%   | Benepure, Chengdu, Sichuan, China         |
| Resveratrol   | Resveratrol | ≥98%   | Nanjing NutriHerb BioTech, Nanjing, China |
| Fisetin       | Fisetin     | ≥98%   | Nanjing NutriHerb BioTech, Nanjing, China |
| Quercetin     | BPBE-601    | ≥95%   | Benepure, Chengdu, Sichuan, China         |
| Fucoidan      | Fucoidan    | ≥95%   | Nanjing NutriHerb BioTech, Nanjing, China |
| EGCG          | BPBE-645    | ≥95%   | Benepure, Chengdu, Sichuan, China         |
| Hesperidin    | BPBE-607    | ≥90%   | Benepure, Chengdu, Sichuan, China         |
| Curcumin      | BPBE-691    | ≥90%   | Benepure, Chengdu, Sichuan, China         |

**Table S3.** Chemical structures, concentrations, and daily doses of phytonutrients

| Phytonutrient                   | Chemical Structure                                                                  | Concentration<br>(Cell Cultures) | % of F1 | Daily Dose<br>(Mice) | Daily Dose<br>(Human<br>Equivalent) |
|---------------------------------|-------------------------------------------------------------------------------------|----------------------------------|---------|----------------------|-------------------------------------|
| Berberine                       | 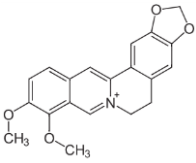   | 10 $\mu$ M or 3.5 $\mu$ g/mL     | 18%     | 36 mg/kg             | 2.88 mg/kg                          |
| Luteolin                        |    | 20 $\mu$ M or 5.7 $\mu$ g/mL     | 10%     | 20 mg/kg             | 1.6 mg/kg                           |
| Resveratrol                     |    | 40 $\mu$ M or 9.1 $\mu$ g/mL     | 18%     | 36 mg/kg             | 2.88 mg/kg                          |
| Fisetin                         |    | 50 $\mu$ M or 14.3 $\mu$ g/mL    | 9%      | 18 mg/kg             | 1.44 mg/kg                          |
| Quercetin                       |  | 25 $\mu$ M or 7.6 $\mu$ g/mL     | 9%      | 18 mg/kg             | 1.44 mg/kg                          |
| Fucoidan                        |  | 100 $\mu$ g/mL                   | 9%      | 18 mg/kg             | 1.44 mg/kg                          |
| Epigallocatechin Gallate (EGCG) |  | 20 $\mu$ M or 9.2 $\mu$ g/mL     | 9%      | 18 mg/kg             | 1.44 mg/kg                          |
| Hesperidin                      |  | 20 $\mu$ M or 12.2 $\mu$ g/mL    | 9%      | 18 mg/kg             | 1.44 mg/kg                          |
| Curcumin                        |  | 20 $\mu$ M or 7.5 $\mu$ g/mL     | 9%      | 18 mg/kg             | 1.44 mg/kg                          |
| F1                              | All of the above                                                                    | 10 $\mu$ g/mL                    | 100%    | 200 mg/kg            | 16 mg/kg                            |
